# Supplementary material for: Direct amide formation in a continuous-flow system mediated by carbon disulfide
Source: Royal Society of Chemistry journal article supplement (doi:10.1039/d0cy01603a), 2020-01-01
Supplement: d0cy01603a1.pdf [file d0cy01603a1.pdf]

## Direct amide formation in a continuous-flow system mediated by carbon disulfide

György Orsy<sup>a,b</sup>, Ferenc Fülöp<sup>\*a,c</sup>, István M. Mándity<sup>\*b,d</sup>

---

<sup>a.</sup> *Institute of Pharmaceutical Chemistry University of Szeged, Eötvös u. 6, H-6720 Szeged, Hungary.*

<sup>b.</sup> *TTK Lendület Artificial Transporter Research Group, Institute of Materials and Environmental Chemistry, Research Center for Natural Sciences, Hungarian Academy of Sciences, Magyar Tudosok krt. 2, 1117 Budapest, Hungary.*

<sup>c.</sup> *Research Group of Stereochemistry of the Hungarian Academy of Sciences, Dóm tér 8, H-6720 Szeged, Hungary.*

<sup>d.</sup> *Department of Organic Chemistry, Faculty of Pharmacy, Semmelweis University, Hőgyes Endre u. 7, H-1092, Budapest, Hungary.*

### Table of Content

|                                                   |        |
|---------------------------------------------------|--------|
| 1. General                                        | S2     |
| 2. General aspects of the CF direct amidation     | S2     |
| 3. Product analysis                               | S2     |
| 4. Tables and Figures                             | S3-S7  |
| 5. <sup>1</sup> H and <sup>13</sup> C NMR spectra | S8-S22 |

## 1. General

All solvents and reagents were of analytical grade and used directly without further purification. Fe, Cu, Fe<sub>2</sub>O<sub>3</sub>, NiO, CuO, Boric acid, AlCl<sub>3</sub>, Al<sub>2</sub>O<sub>3</sub> (for chromatography, activated, neutral, Brockmann I, 50-200 μm, 60 Å) catalysts, carbon disulfide (anhydrous, ≥99%) reagent and organic bases (trimethylamine, pyridine, 4-(dimethylamino)pyridine) used in this study were purchased from Sigma-Aldrich (Budapest, Hungary), while Acetonitrile (100,0%) was HPLC LC MS-grade solvents from VWR International (Debrecen, Hungary).

## 2. General aspects of the Continuous-Flow (CF) amidation

The CF amidation reactions were carried out in a home-made flow reactor consisting of an HPLC pump (Jasco PU-987 Intelligent Prep. Pump), a stainless steel HPLC column as catalyst bed (internal dimensions 250mm L × 4.6 ID × ¼ in OD), a stainless steel preheating coil (internal diameter 1 mm and length 30 cm) and a commercially available backpressure regulator (Thalesnano back pressure module 300™, Budapest, Hungary, to a maximum of 300 bar). Parts of the system were connected with stainless steel tubing (internal diameter 1 mm). The HPLC column was charged with 4 g of the alumina catalyst. It was then placed into a GC oven unit (Carlo Erba HR 5300 up to maximum a 350 °C). For the CF reactions, 100 mM solution of the appropriate starting material was prepared in solvent. The solution was homogenized by sonication for 5 min and then pumped through the CF reactor under the set conditions. After the completion of the reaction, the reaction mixture was collected, and the rest solvent was evaporated by a vacuum rotary evaporator.

## 3. Product analysis

The products obtained were characterized by <sup>1</sup>H NMR spectroscopy. <sup>1</sup>H-NMR and APT-<sup>13</sup>C-NMR spectra were recorded on a Bruker AV NEO Ascend 500 spectrometer and Varian, in DMSO-*d*<sub>6</sub> as applied solvent, at 500.2 MHz. Chemical shifts (δ) are expressed in ppm and are internally referenced (<sup>1</sup>H NMR: 2.50 ppm in DMSO-*d*<sub>6</sub>).

#### 4. Tables and Figures

**Table S1.** The model reaction and optimization of amide formation in flow reactor

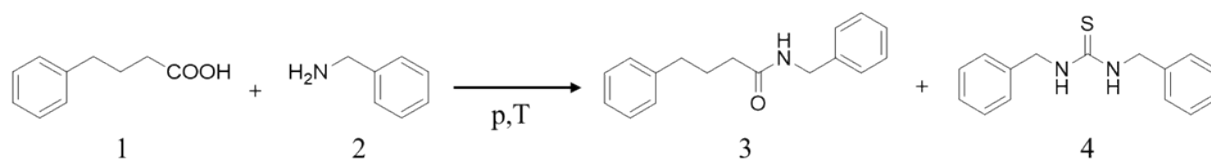

| Entr<br>y | Substrat<br>e<br>A | Substrat<br>e<br>B | Lewis<br>acid | Reagent                          | Solven<br>t | Conditio<br>n                     | Conversio<br>n   |
|-----------|--------------------|--------------------|---------------|----------------------------------|-------------|-----------------------------------|------------------|
| 1         | 4-PBA              | BA                 | -             | -                                | ACN         | 200°C<br>0.1<br>ml/min<br>50 bar  | 0%               |
| 2         | 4-PBA              | BA                 | Alumina       | -                                | ACN         | 200°C<br>0.1<br>ml/min<br>50 bar  | 0% <sup>a</sup>  |
| 3         | 4-PBA              | BA                 | -             | CS <sub>2</sub>                  | ACN         | 200 °C<br>0.1<br>ml/min<br>50 bar | 22%              |
| 4         | 4-PBA              | BA                 | Alumina       | CS <sub>2</sub>                  | ACN         | 200 °C<br>0.1<br>ml/min<br>50 bar | 53% <sup>b</sup> |
| 5         | 4-PBA              | BA                 | Alumina       | CS <sub>2</sub><br>Triethylamine | ACN         | 200 °C<br>0.1<br>ml/min<br>50 bar | 62%              |
| 6         | 4-PBA              | BA                 | Alumina       | CS <sub>2</sub><br>Pyridine      | ACN         | 200 °C<br>0.1<br>ml/min<br>50 bar | 58%              |
| 7         | 4-PBA              | BA                 | Alumina       | CS <sub>2</sub><br>DMAP          | ACN         | 200 °C<br>0.1<br>ml/min<br>50 bar | >99%             |

4-PBA: 4-phenylbutyric acid, BA: benzylamine, DMAP: 4-(dimethylamino)pyridine, ACN: acetonitrile, CS<sub>2</sub>: carbon disulfide, a: Acetylation side reaction was only observed; b: 31% thiourea formation was observed.

**Table S2.** Screen of alternative catalysts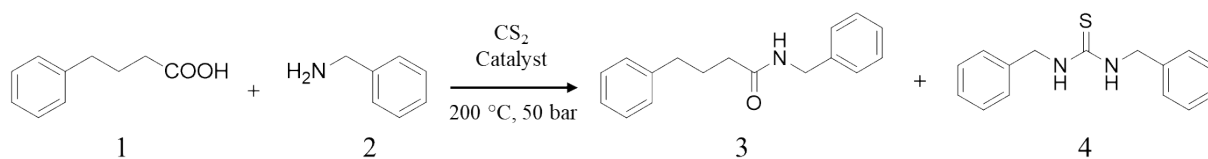

| <i>Entry</i> | <i>Lewis acid</i>       | <i>Reagent</i> | <i>Solvent</i> | <i>Conversion into 3 (%)</i> |
|--------------|-------------------------|----------------|----------------|------------------------------|
| <i>1</i>     | boric acid              | $\text{CS}_2$  | acetonitrile   | 2%                           |
| <i>2</i>     | Fe                      | $\text{CS}_2$  | acetonitrile   | 3%                           |
| <i>3</i>     | Cu                      | $\text{CS}_2$  | acetonitrile   | 17%                          |
| <i>4</i>     | $\text{Fe}_2\text{O}_3$ | $\text{CS}_2$  | acetonitrile   | 10%                          |
| <i>5</i>     | NiO                     | $\text{CS}_2$  | acetonitrile   | 4%                           |
| <i>6</i>     | CuO                     | $\text{CS}_2$  | acetonitrile   | 40%                          |
| <i>7</i>     | $\text{Al}_2\text{O}_3$ | $\text{CS}_2$  | acetonitrile   | 53%                          |

1 equiv. 4-phenylbutyric acid (100 mM), 1 equiv. benzyl amine (100 mM), *Reagent*: 1.5 equiv.  $\text{CS}_2$  *Condition*:  $200\text{ }^\circ\text{C}$ , 50 bar,  $0.1\text{ mL min}^{-1}$ , 27 min residence time

**Table S3.** Direct amide bond formation in a range of solvents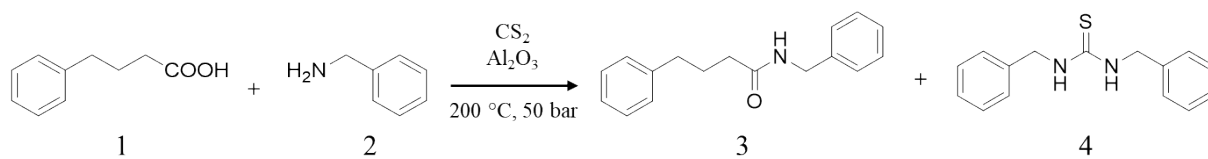

| <i>Entry</i> | <i>Solvent</i>    | <i>Conversion into 3 (%)</i> |
|--------------|-------------------|------------------------------|
| 1            | Water             | 0%                           |
| 2            | Methanol          | 31%                          |
| 3            | Isopropanol       | 10%                          |
| 4            | Toluene           | 43%                          |
| 5            | Acetonitrile      | 53%                          |
| 6            | Dichloromethane   | 0%                           |
| 7            | Dimethylsulfoxide | 4%                           |

1 equiv. 4-phenylbutyric acid (100 mM), 1 equiv. benzyl amine (100 mM), *Lewis acid*: alumina, *Reagent*: 1.5 equiv.  $\text{CS}_2$  *Condition*:  $200\text{ }^\circ\text{C}$ , 50 bar,  $0.1\text{ mL min}^{-1}$ , 27 min residence time

**Table S4.** Effect of the different amount of carbon disulfide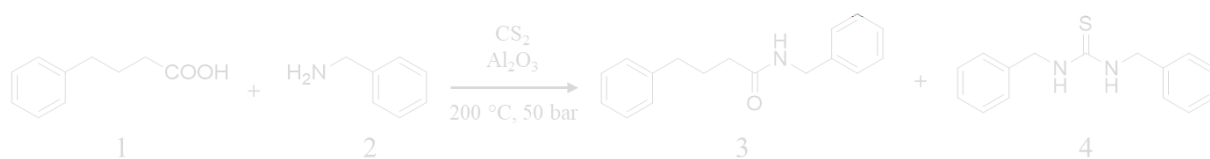

| <i>Entry</i> | <i>Lewis acid</i>       | <i>Reagent</i>          | <i>Solvent</i> | <i>Conversion into 3 (%)</i> |
|--------------|-------------------------|-------------------------|----------------|------------------------------|
| <i>1</i>     | $\text{Al}_2\text{O}_3$ | 0.5 equiv $\text{CS}_2$ | acetonitrile   | 26%                          |
| <i>2</i>     | $\text{Al}_2\text{O}_3$ | 1 equiv $\text{CS}_2$   | acetonitrile   | 43%                          |
| <i>3</i>     | $\text{Al}_2\text{O}_3$ | 1.5 equiv $\text{CS}_2$ | acetonitrile   | 53%                          |
| <i>4</i>     | $\text{Al}_2\text{O}_3$ | 2 equiv $\text{CS}_2$   | acetonitrile   | 49%                          |
| <i>5</i>     | $\text{Al}_2\text{O}_3$ | 3 equiv $\text{CS}_2$   | acetonitrile   | 45%                          |

*1 equiv. 4-phenylbutyric acid (100 mM), 1 equiv. benzyl amine (100 mM), Lewis acid: alumina, Reagent:  $\text{CS}_2$  Condition:  $200\text{ }^\circ\text{C}$ , 50 bar,  $0.1\text{ mL min}^{-1}$ , 27 min residence time*

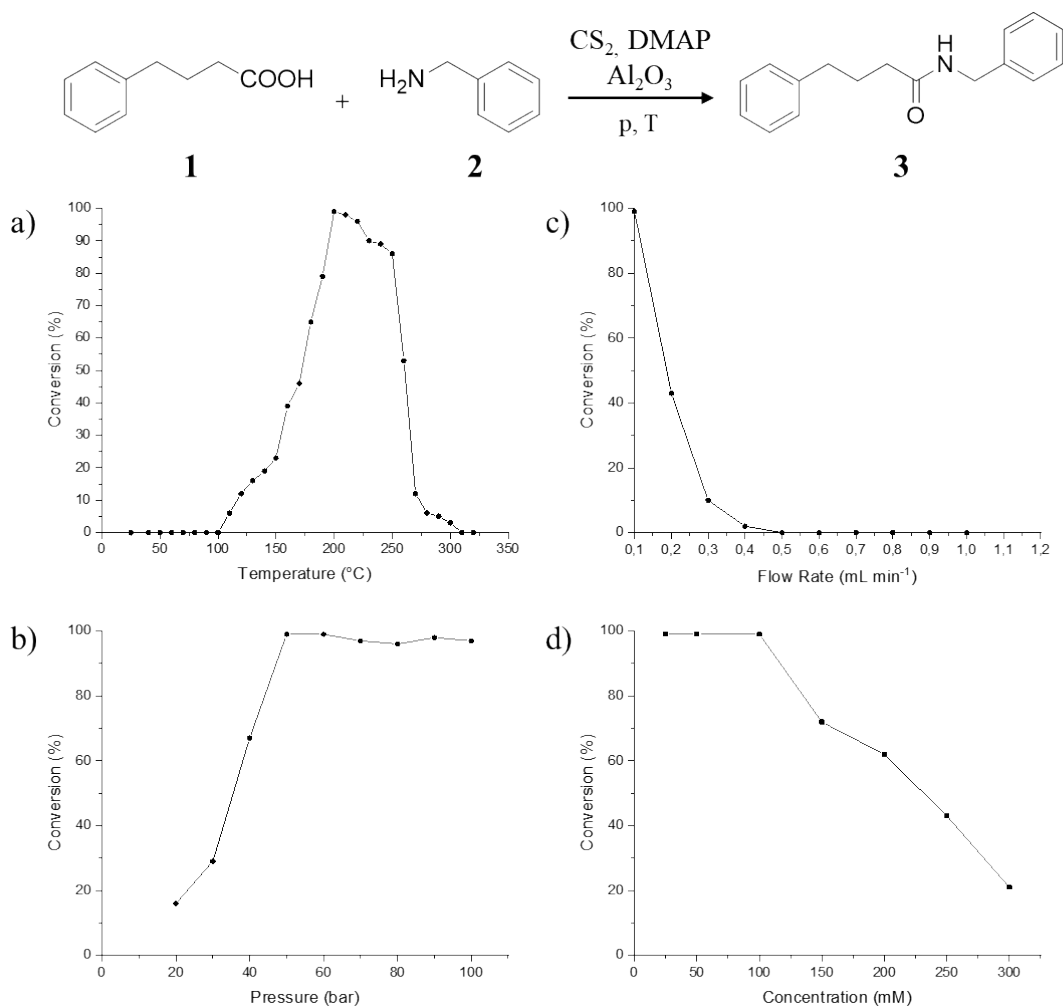

**Fig. S1** The effect of temperature (a), pressure (b), flow rate (c), and concentration of the starting materials (d) on the reaction conversion catalyzed by  $\text{Al}_2\text{O}_3$ . The effect of the pressure was measured at room temperature, the influence of temperature was determined at 50 bar, while the effect of the flow rate and concentration was analyzed under the optimized conditions.

## 5. $^1\text{H}$ and $^{13}\text{C}$ NMR spectra

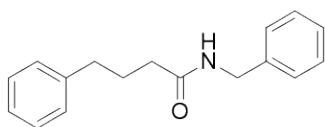

N-benzyl-4-phenylbutanamide

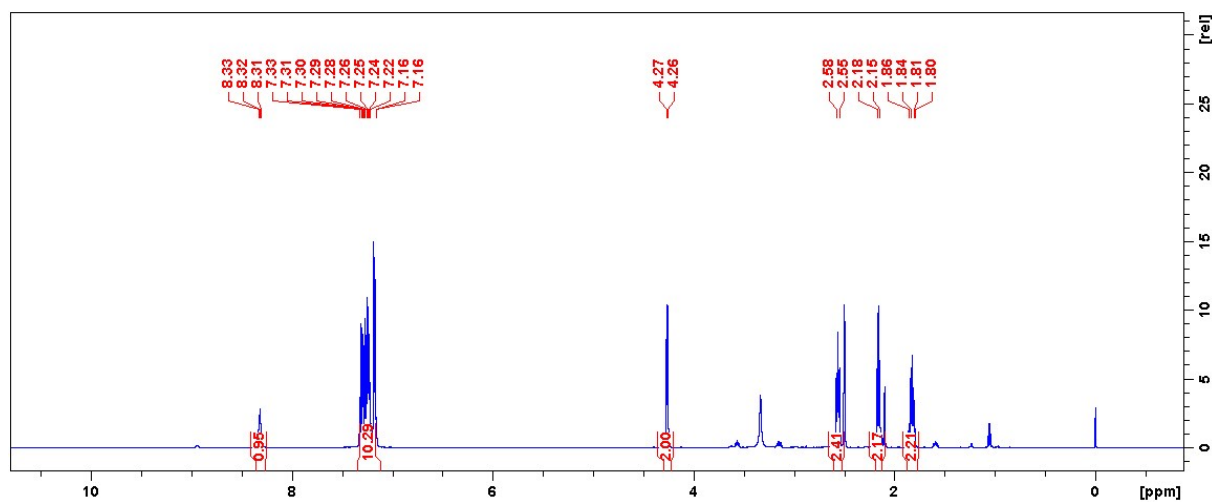

**Figure S2.**  $^1\text{H}$  NMR spectrum of N-benzyl-4-phenylbutanamide measured in DMSO- $d_6$  at 296 K.

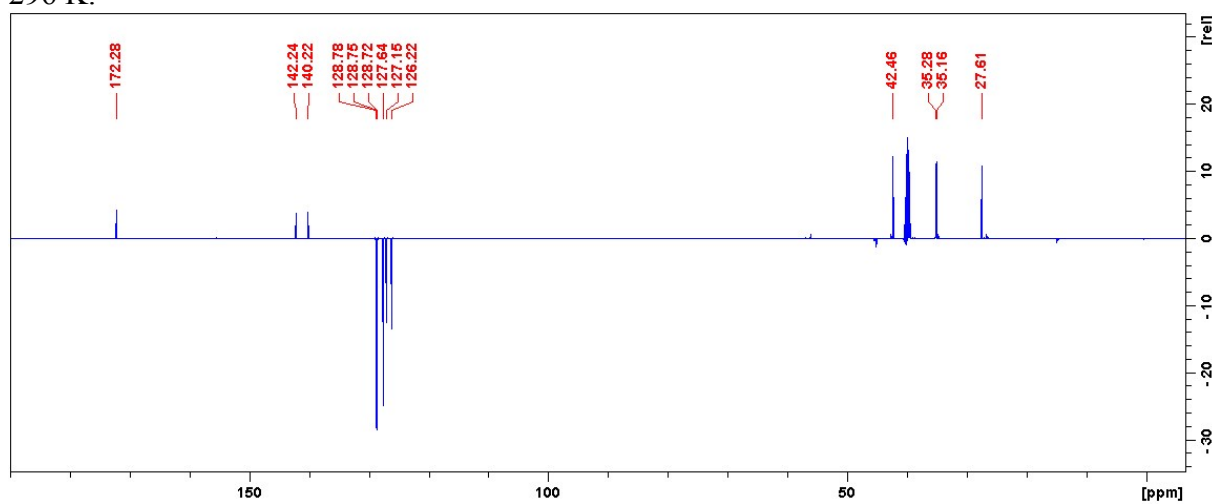

**Figure S3.** APT  $^{13}\text{C}$  NMR spectrum of N-benzyl-4-phenylbutanamide measured in DMSO- $d_6$  at 296 K.



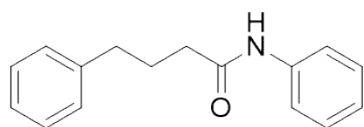

N,4-diphenylbutanamide

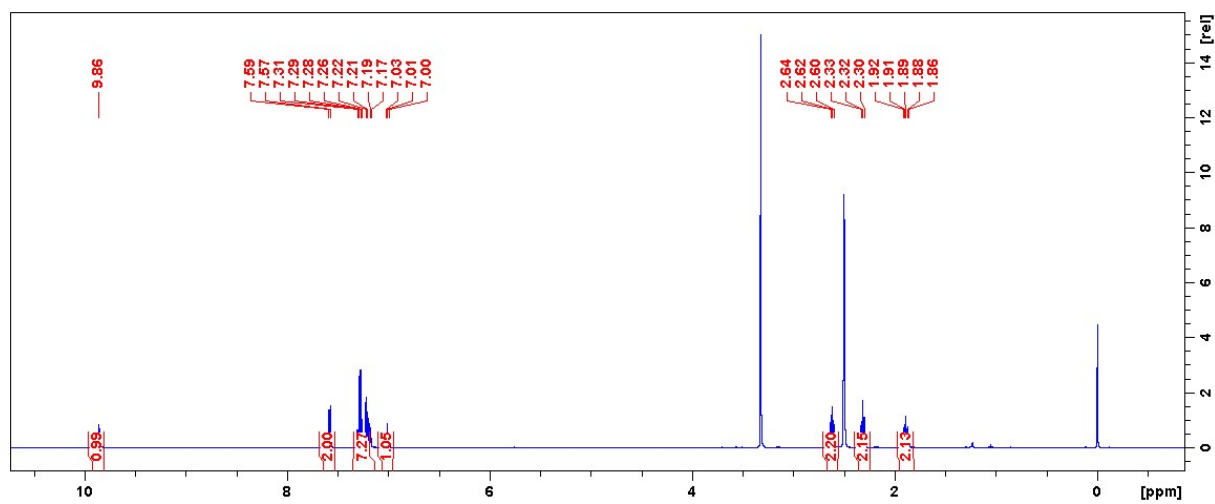

Figure S4.  $^1\text{H}$  NMR spectrum of N,4-diphenylbutanamide measured in DMSO- $d_6$  at 296 K.

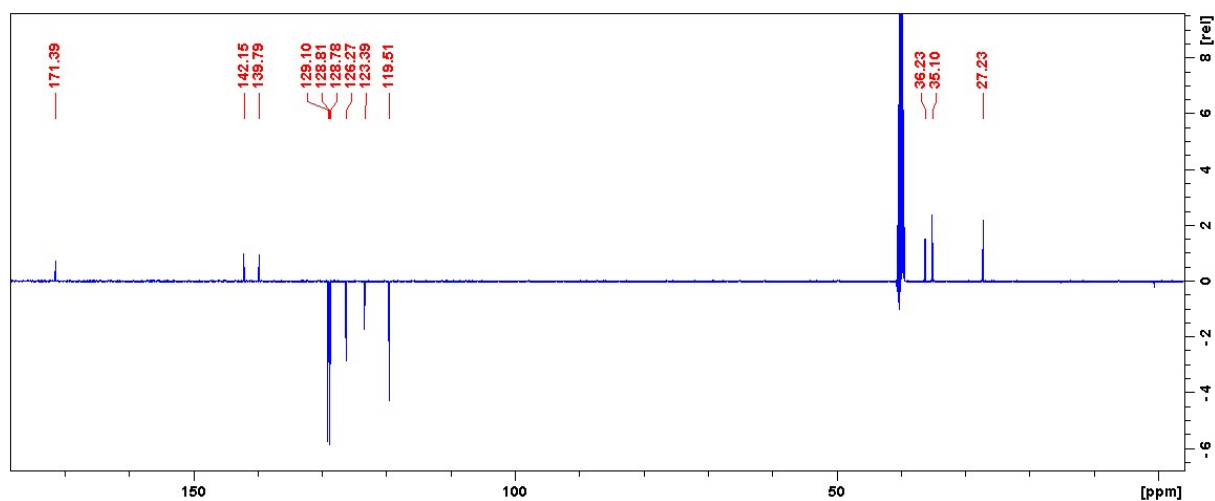

Figure S5. APT NMR spectrum of N,4-diphenylbutanamide measured in DMSO- $d_6$  at 296 K.

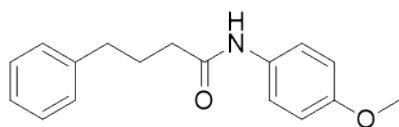

N-(4-methoxyphenyl)-4-phenylbutanamide

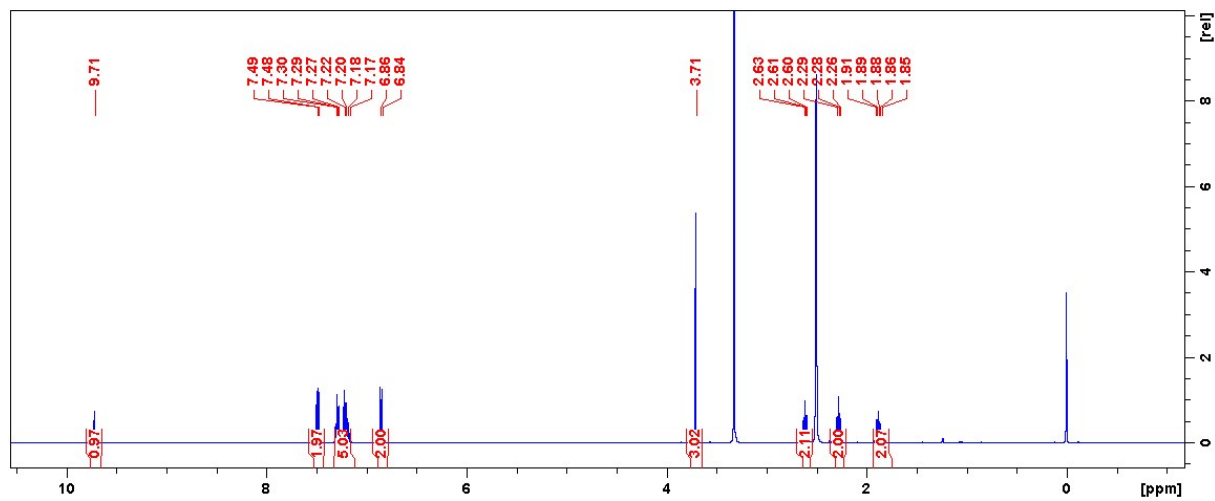

**Figure S6.**  $^1\text{H}$  NMR spectrum of N-(4-methoxyphenyl)-4-phenylbutanamide measured in DMSO- $d_6$  at 296 K.

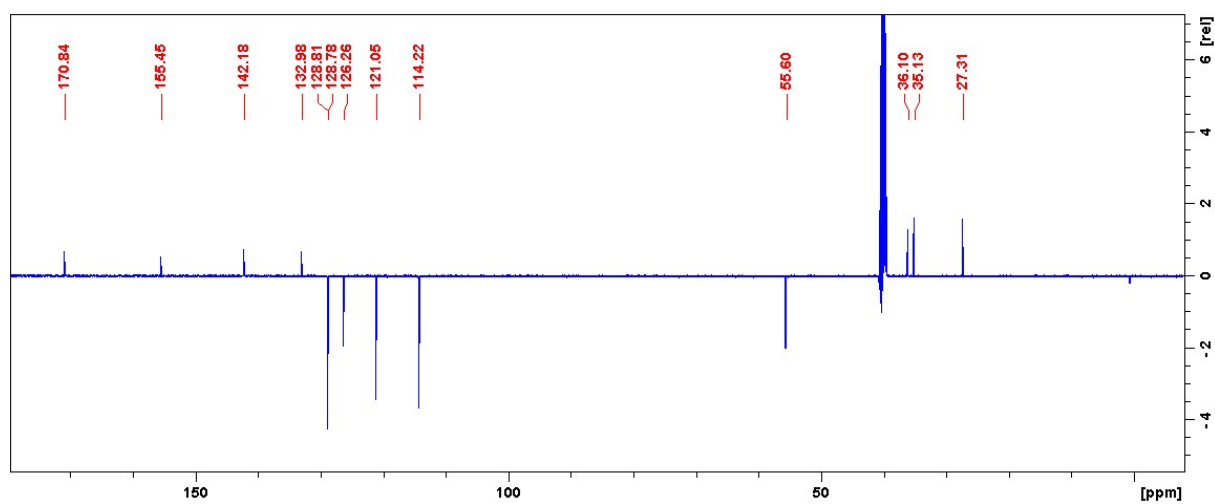

**Figure S7.** ATP NMR spectrum of N-(4-methoxyphenyl)-4-phenylbutanamide measured in DMSO- $d_6$  at 296 K.

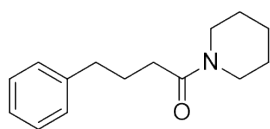

4-phenyl-1-(piperidin-1-yl)butan-1-one

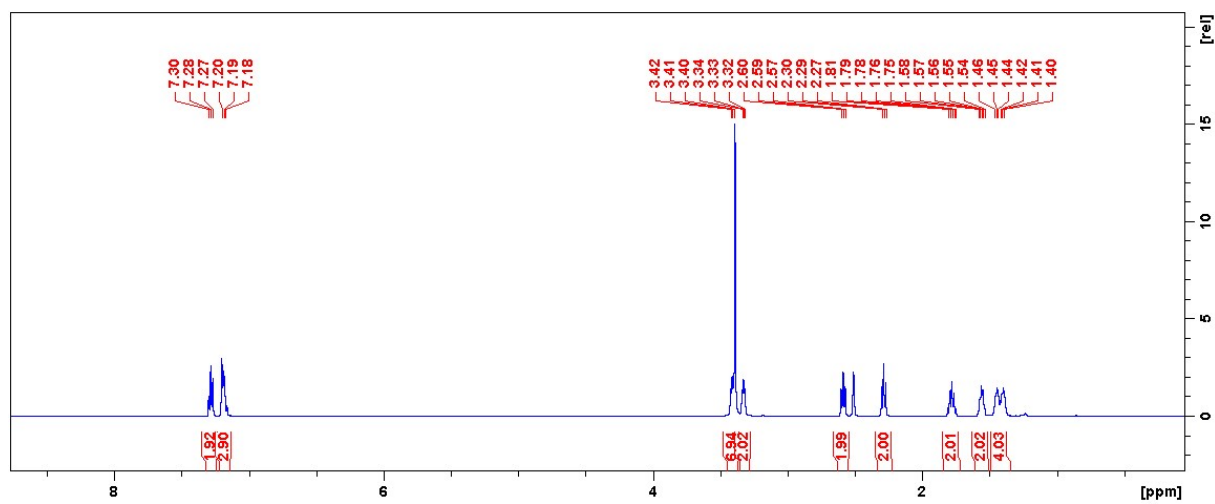

**Figure S8.** <sup>1</sup>H NMR spectrum of 4-phenyl-1-(piperidin-1-yl)butan-1-one measured in DMSO-d<sub>6</sub> at 296 K.

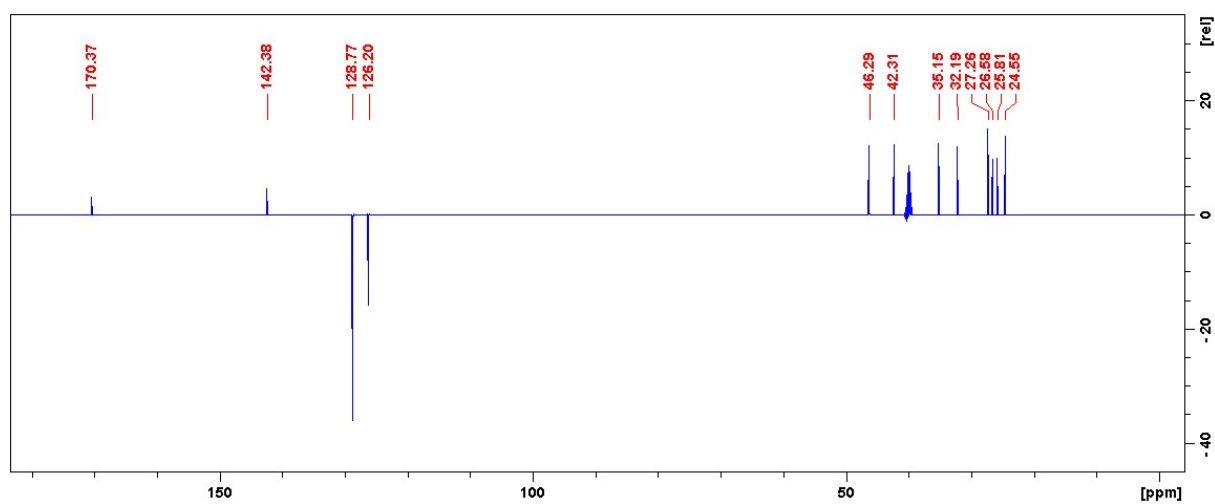

**Figure S9.** APT NMR spectrum of 4-phenyl-1-(piperidin-1-yl)butan-1-one measured in DMSO-d<sub>6</sub> at 296 K.

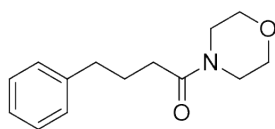

4-phenyl-1-(piperidin-1-yl)butan-1-one

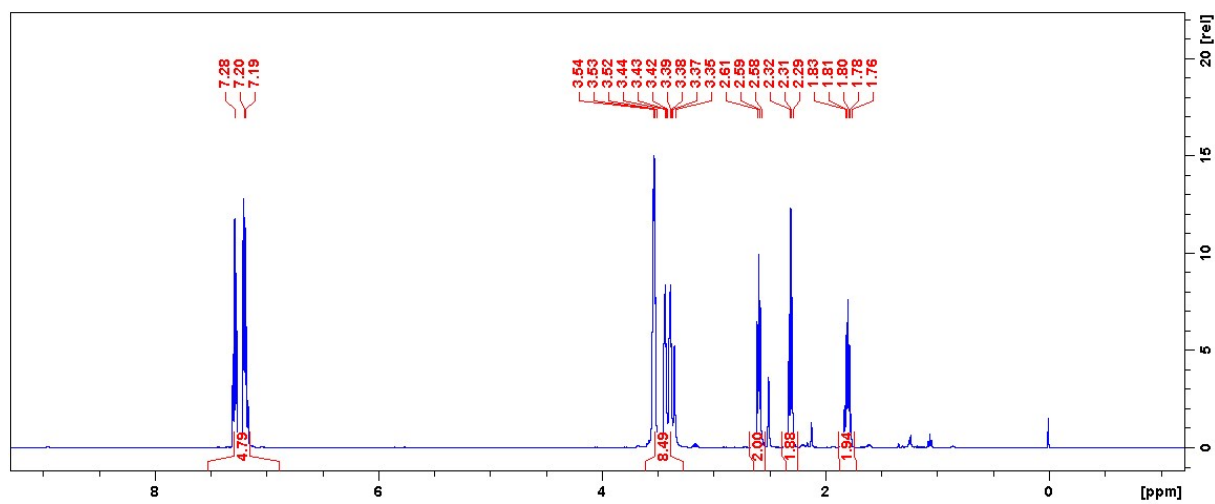

**Figure S10.**  $^1\text{H}$  NMR spectrum of 4-phenyl-1-(piperidin-1-yl)butan-1-one measured in DMSO- $d_6$  at 296 K.

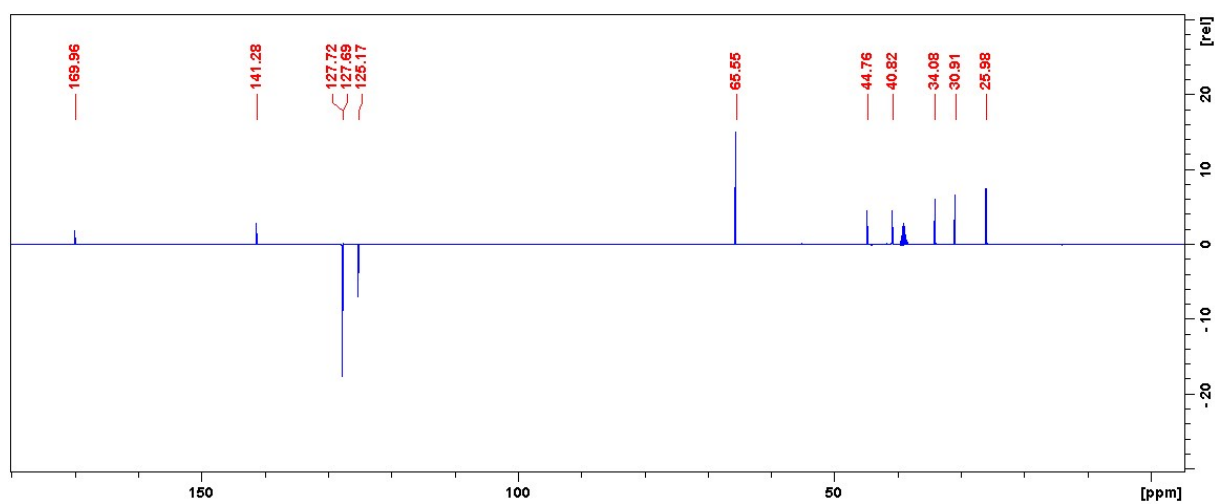

**Figure S11.** ATP NMR spectrum of 4-phenyl-1-(piperidin-1-yl)butan-1-one measured in DMSO- $d_6$  at 296 K.

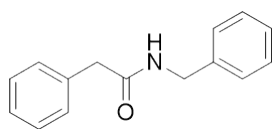

N-benzyl-2-phenylacetamide

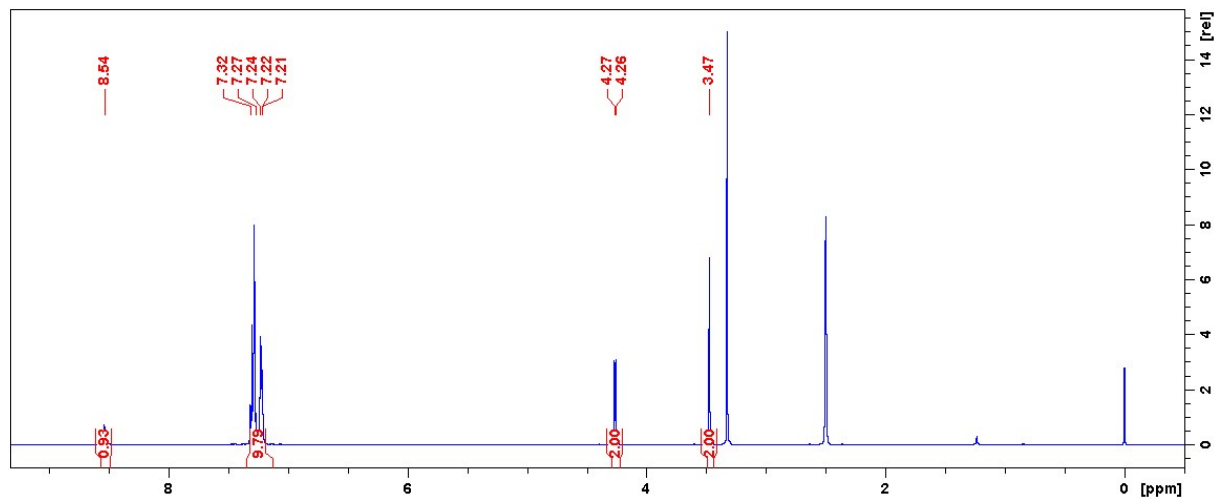

**Figure S12.** <sup>1</sup>H NMR spectrum of N-benzyl-2-phenylacetamide measured in DMSO-d<sub>6</sub> at 296 K.

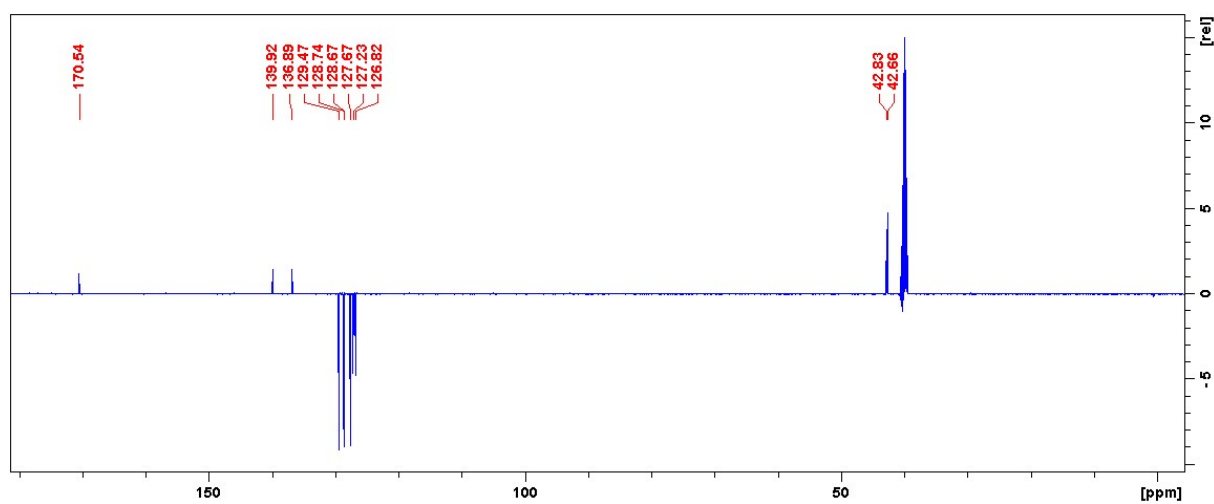

**Figure S13.** APT NMR spectrum of N-benzyl-2-phenylacetamide measured in DMSO-d<sub>6</sub> at 296 K.

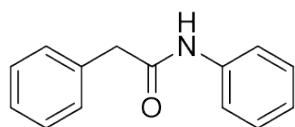

N,2-diphenylacetamide

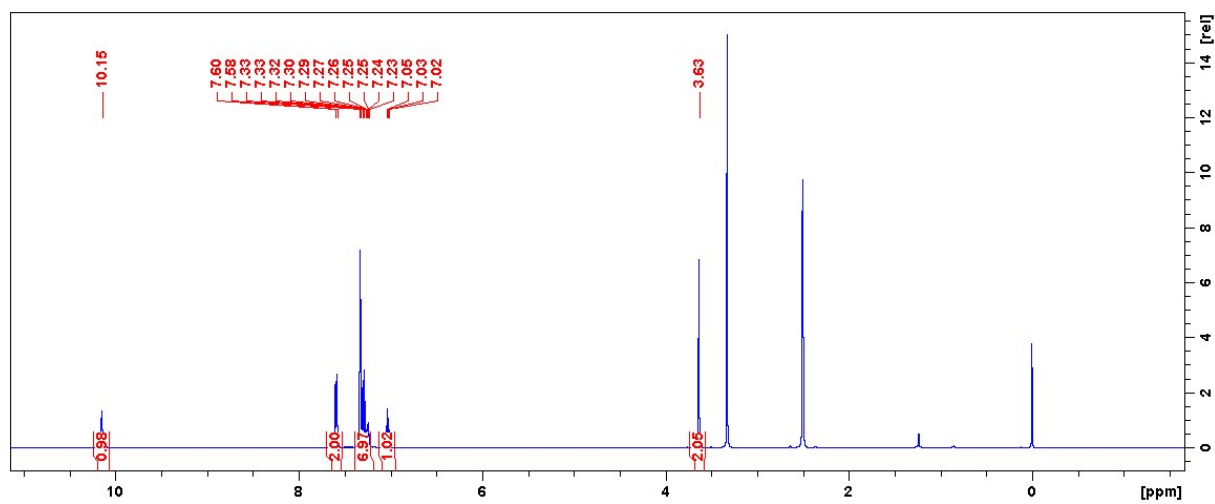

Figure S14.  $^1\text{H}$  NMR spectrum of N,2-diphenylacetamide measured in DMSO- $d_6$  at 296 K.

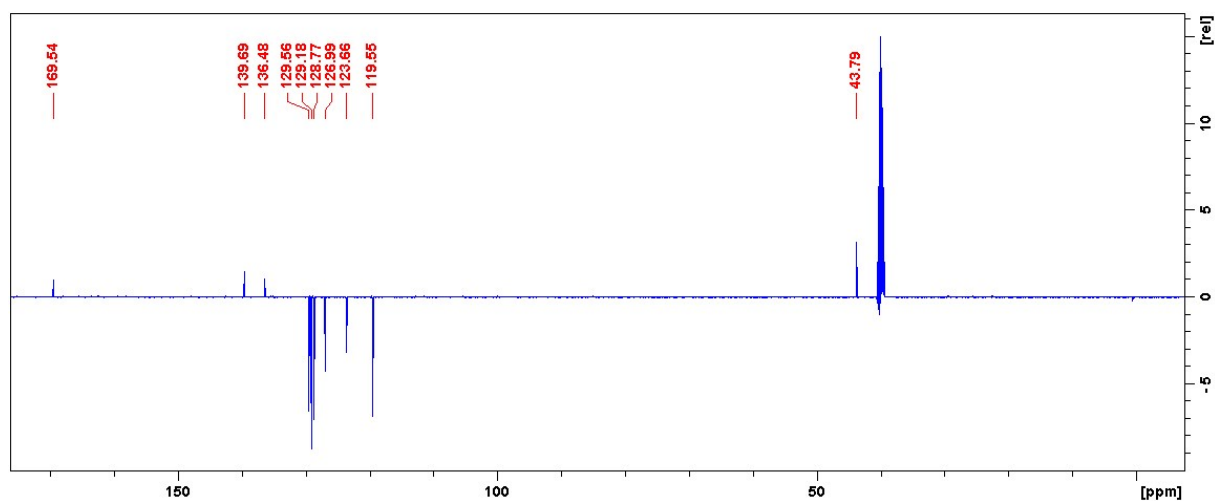

Figure S15. APT NMR spectrum of N,2-diphenylacetamide measured in DMSO- $d_6$  at 296 K.

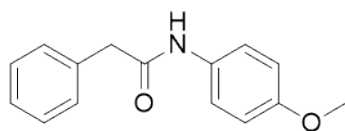

N-(4-methoxyphenyl)-2-phenylacetamide

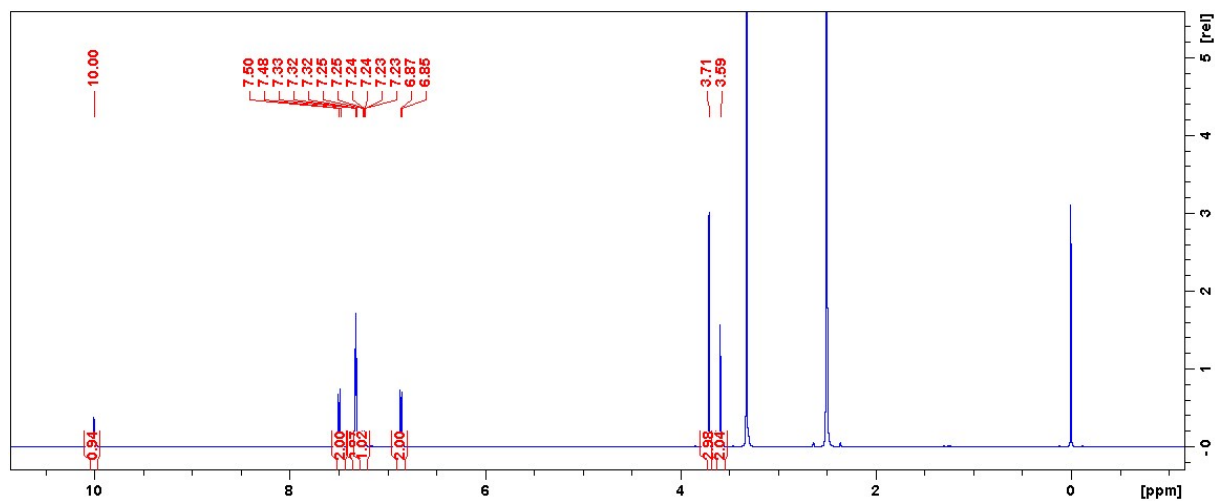

**Figure S16.**  $^1\text{H}$  NMR spectrum of N-(4-methoxyphenyl)-2-phenylacetamide measured in DMSO- $d_6$  at 296 K.

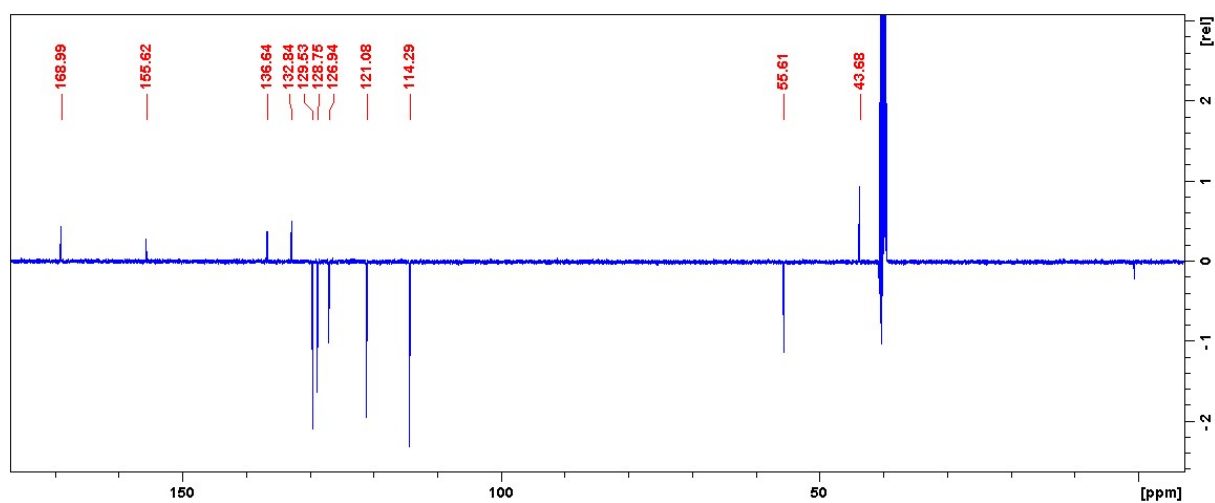

**Figure S17.** APT NMR spectrum of N-(4-methoxyphenyl)-2-phenylacetamide measured in DMSO- $d_6$  at 296 K.

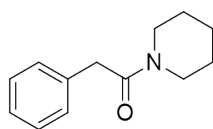

2-phenyl-1-(piperidin-1-yl)ethanone

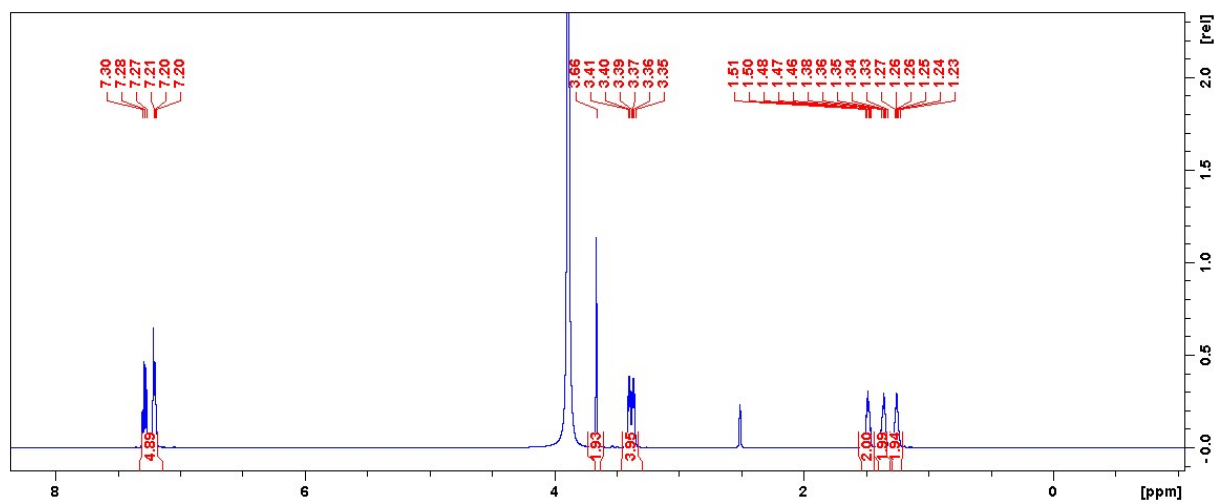

**Figure S18.**  $^1\text{H}$  NMR spectrum of 2-phenyl-1-(piperidin-1-yl)ethanone measured in  $\text{DMSO-d}_6$  at 296 K.

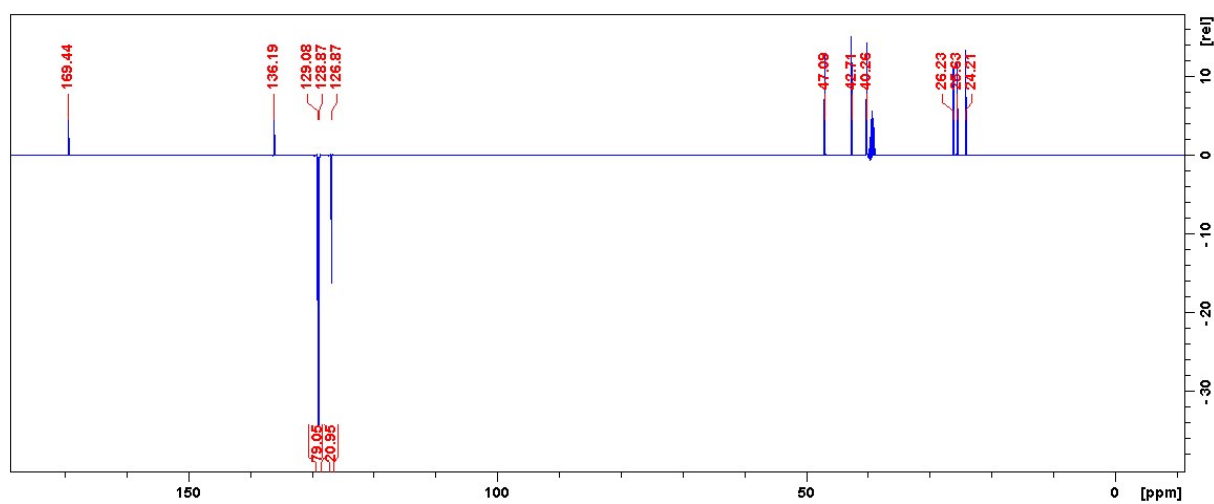

**Figure S19.** APT NMR spectrum of 2-phenyl-1-(piperidin-1-yl)ethanone measured in  $\text{DMSO-d}_6$  at 296 K.



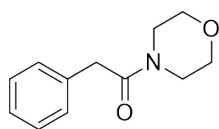

1-morpholino-2-phenylethanone

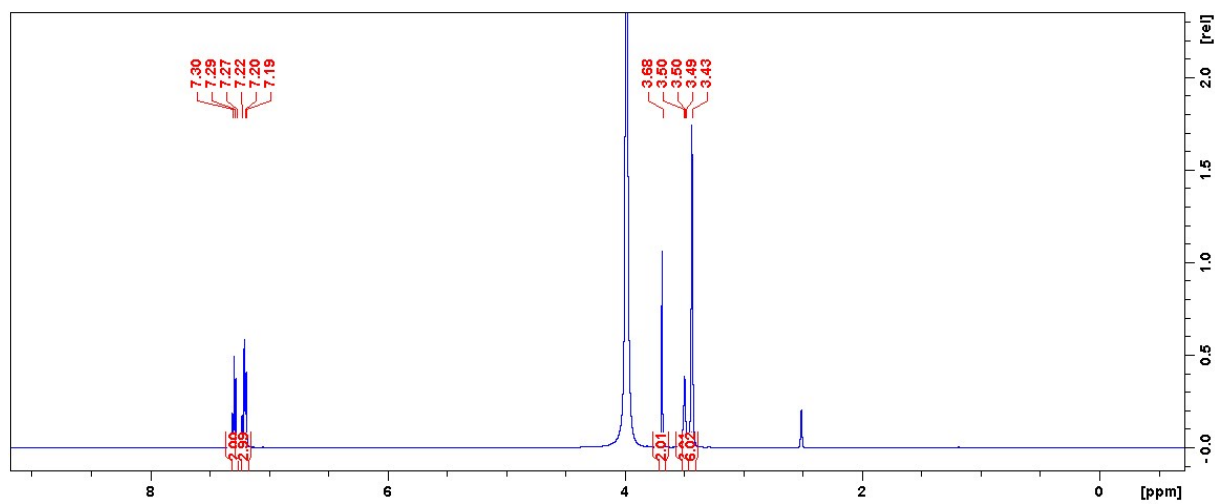

**Figure S20.**  $^1\text{H}$  NMR spectrum of 1-morpholino-2-phenylethanone measured in DMSO- $d_6$  at 296 K.

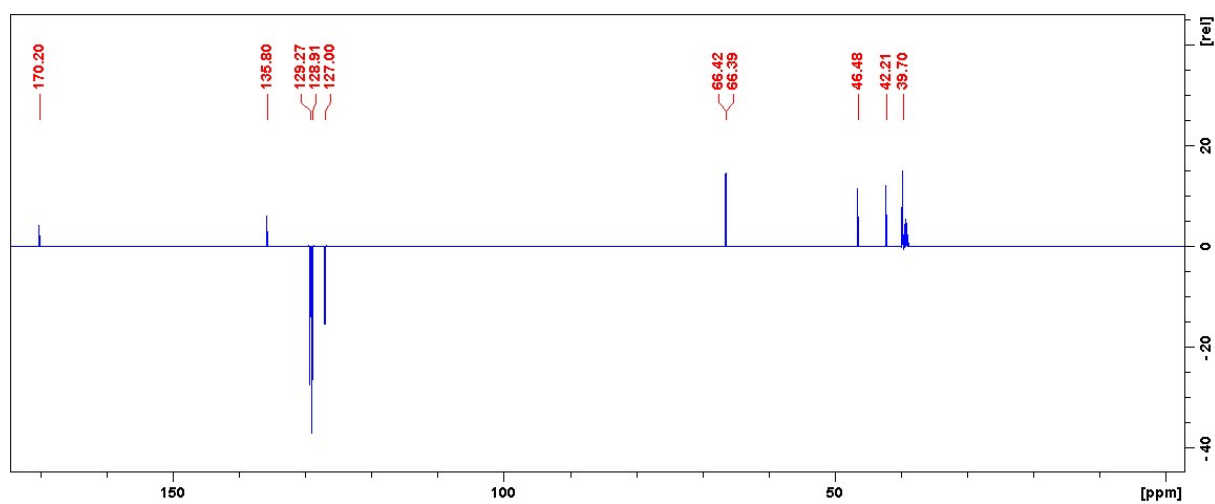

**Figure S21.** APT NMR spectrum of 1-morpholino-2-phenylethanone measured in DMSO- $d_6$  at 296 K.

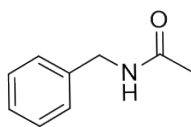

N-benzylacetamide

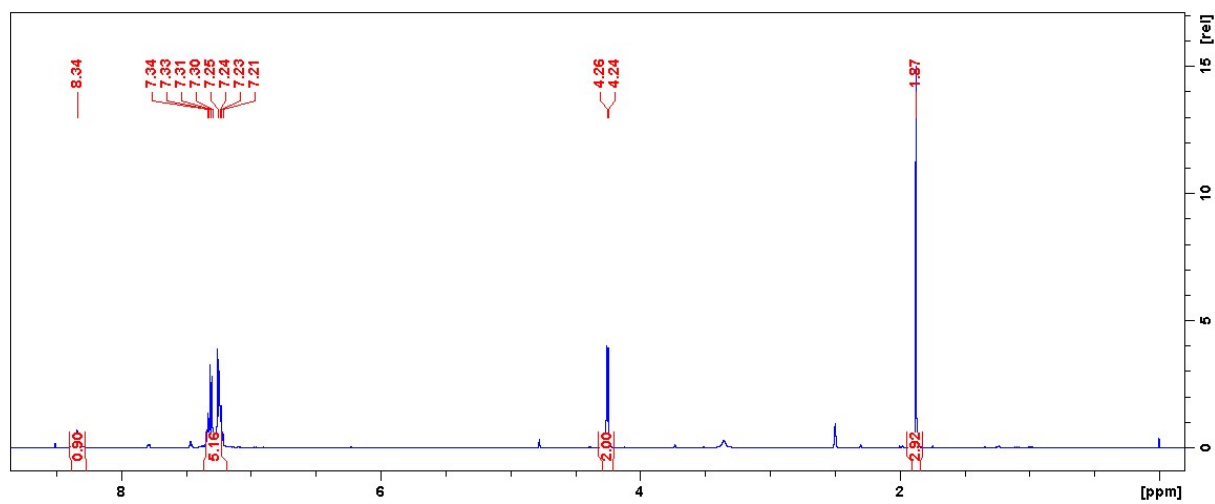

Figure S22.  $^1\text{H}$  NMR spectrum of N-benzylacetamide measured in DMSO-d6 at 296 K.

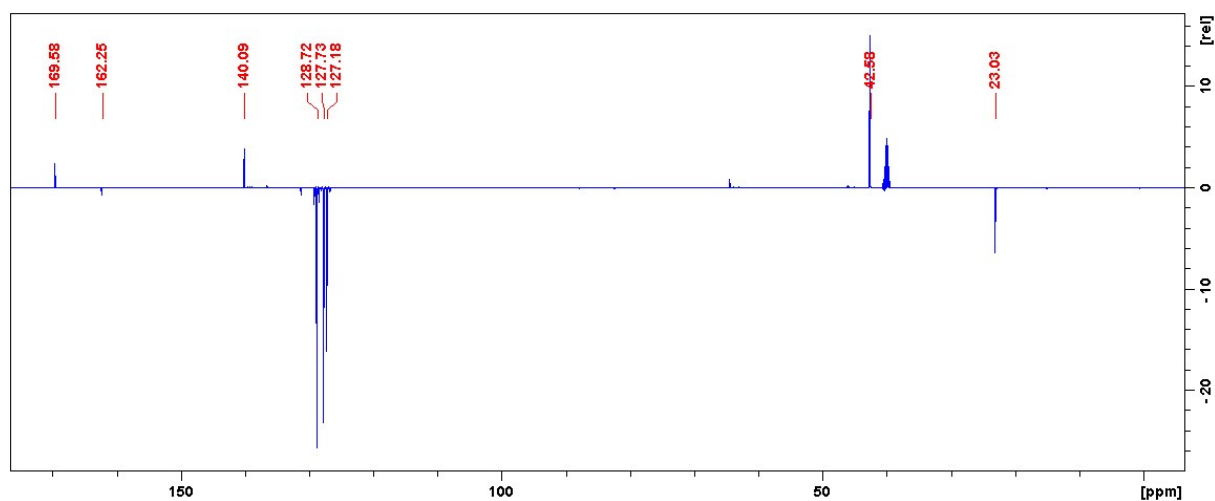

Figure S23. APT NMR spectrum of N-benzylacetamide measured in DMSO-d6 at 296 K.

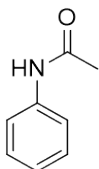

N-phenylacetamide

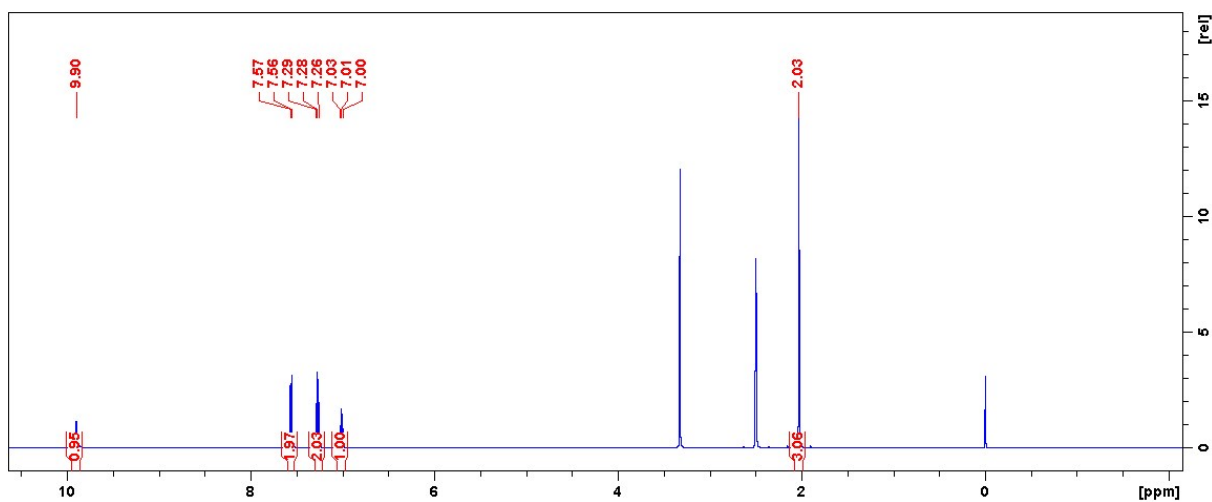

Figure S24.  $^1\text{H}$  NMR spectrum of N-phenylacetamide measured in DMSO- $d_6$  at 296 K.

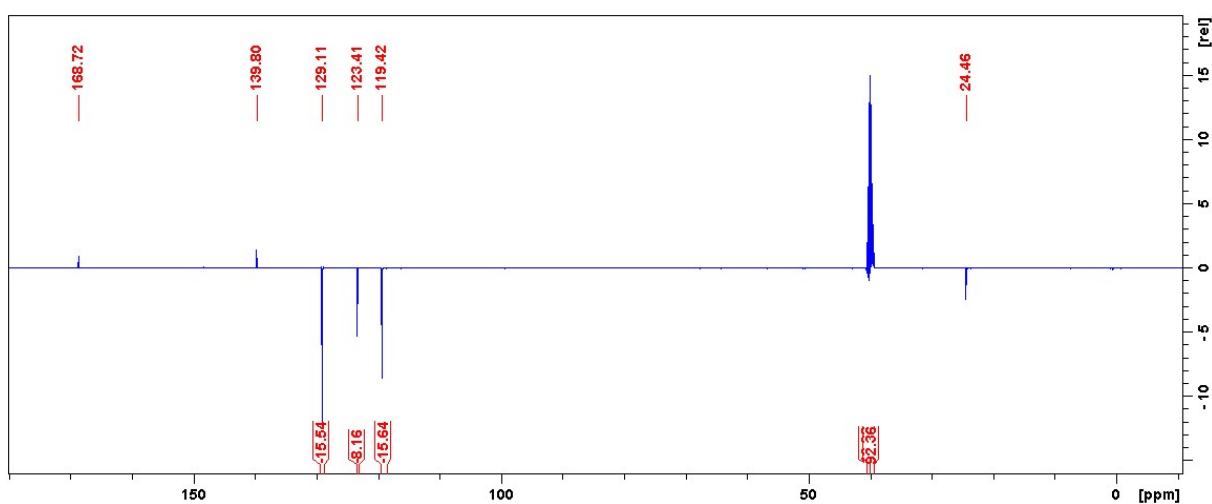

Figure S25. APT NMR spectrum of N-phenylacetamide measured in DMSO- $d_6$  at 296 K.

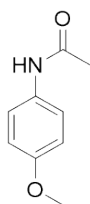

N-(4-methoxyphenyl)acetamide

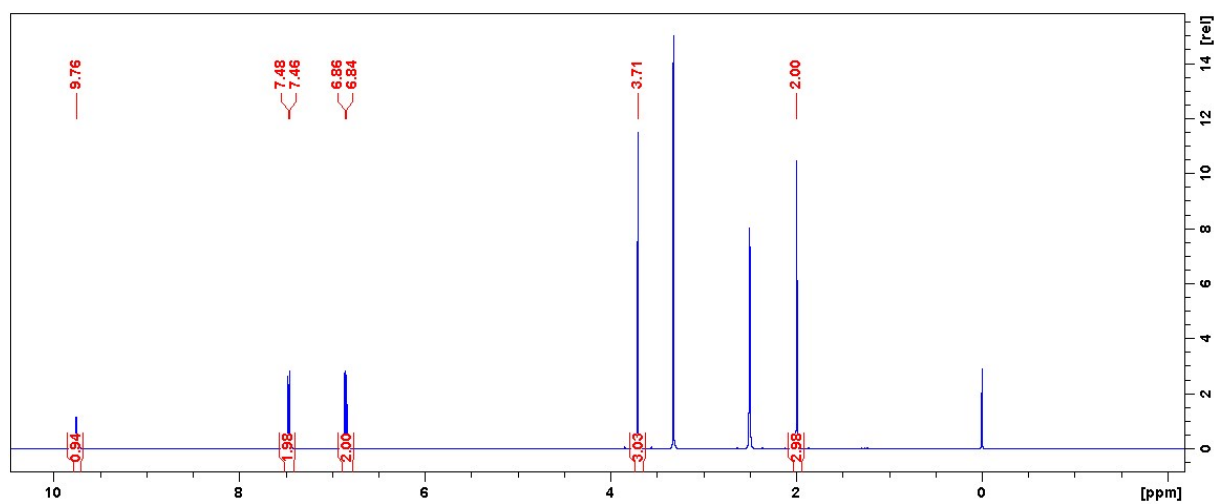

**Figure S26.**  $^1\text{H}$  NMR spectrum of N-(4-methoxyphenyl)acetamide measured in DMSO- $d_6$  at 296 K.

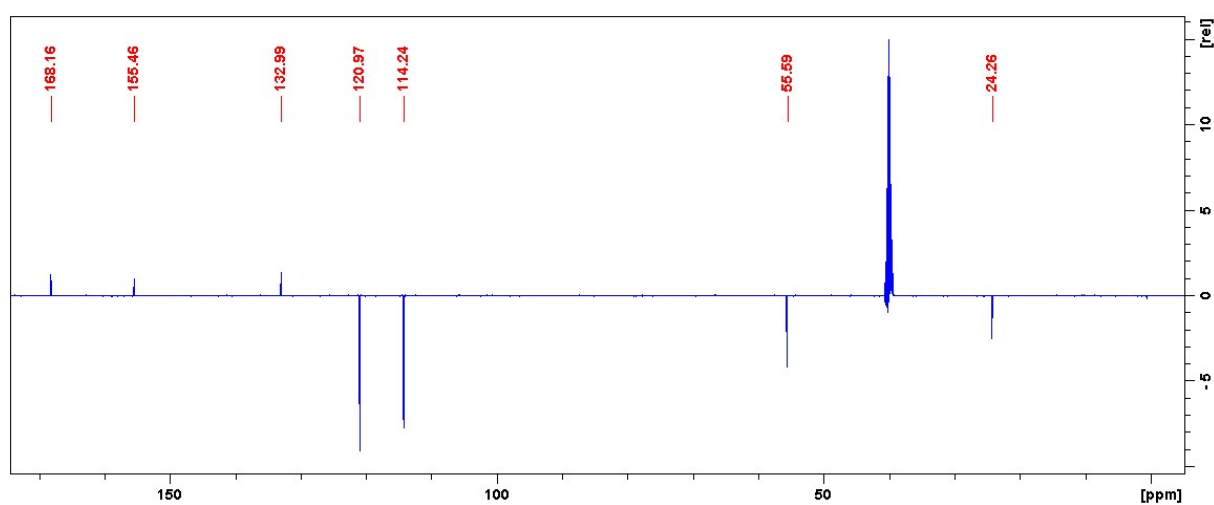

**Figure S27.** APT NMR spectrum of N-(4-methoxyphenyl)acetamide measured in DMSO- $d_6$  at 296 K.

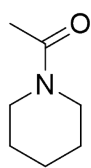

1-(piperidin-1-yl)ethanone

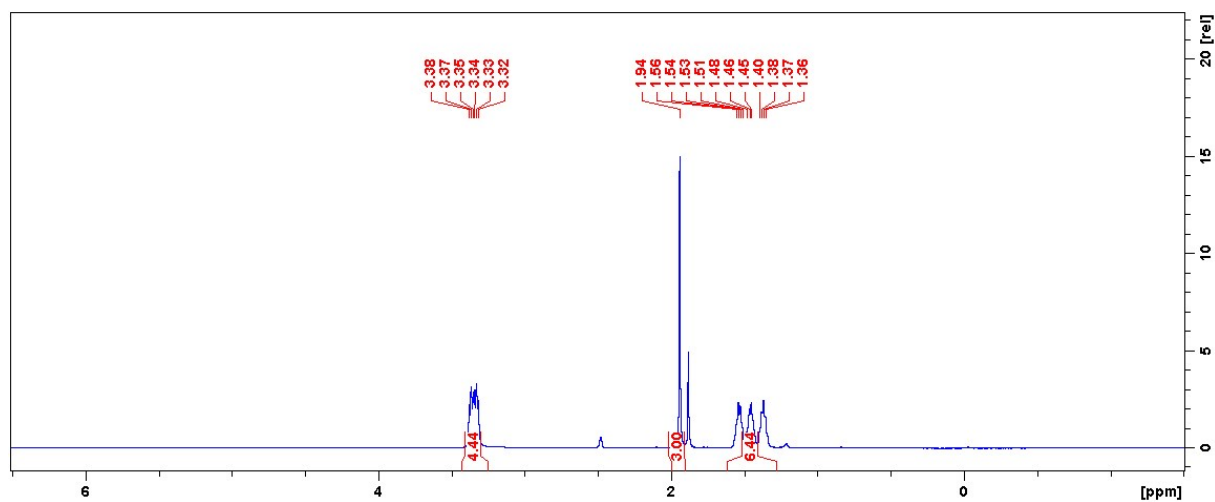

**Figure S28.**  $^1\text{H}$  NMR spectrum of 1-(piperidin-1-yl)ethanone measured in DMSO- $d_6$  at 296 K.

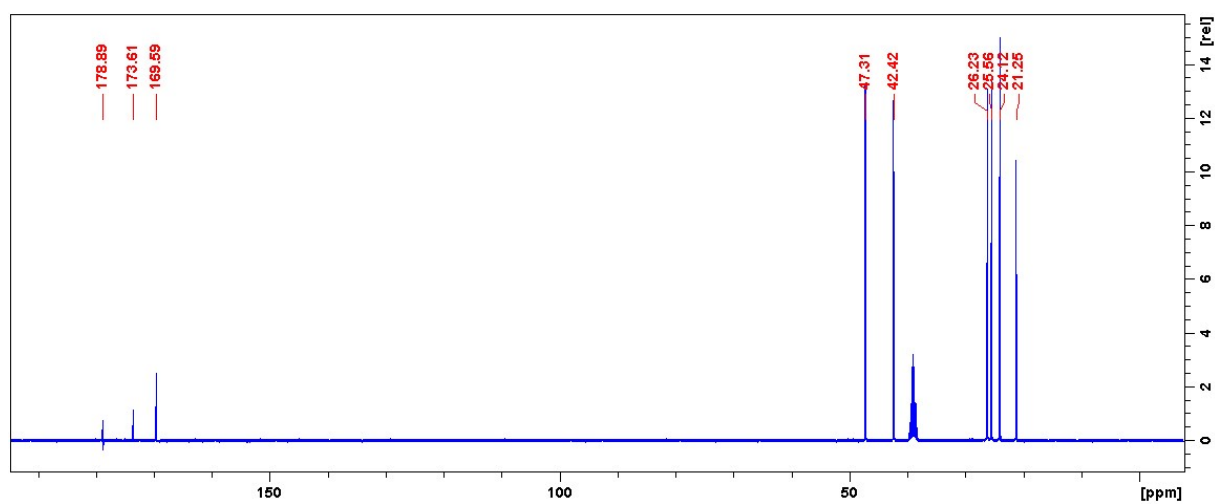

**Figure S29.**  $^{13}\text{C}$  NMR spectrum of 1-(piperidin-1-yl)ethanone measured in DMSO- $d_6$  at 296 K.

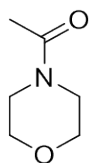

1-morpholinoethanone

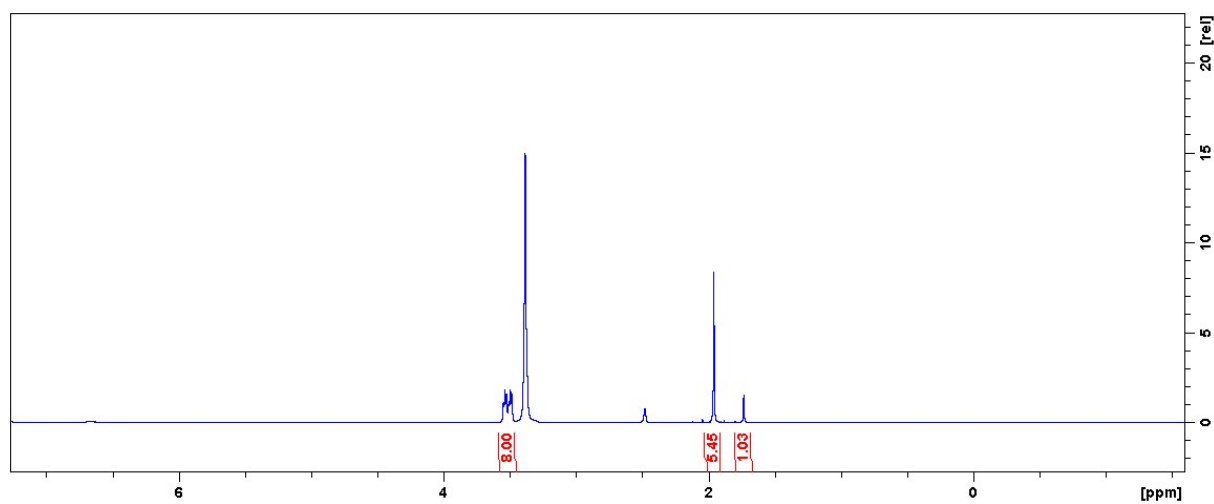

Figure S30.  $^1\text{H}$  NMR spectrum of 1-morpholinoethanone measured in DMSO- $d_6$  at 296 K.

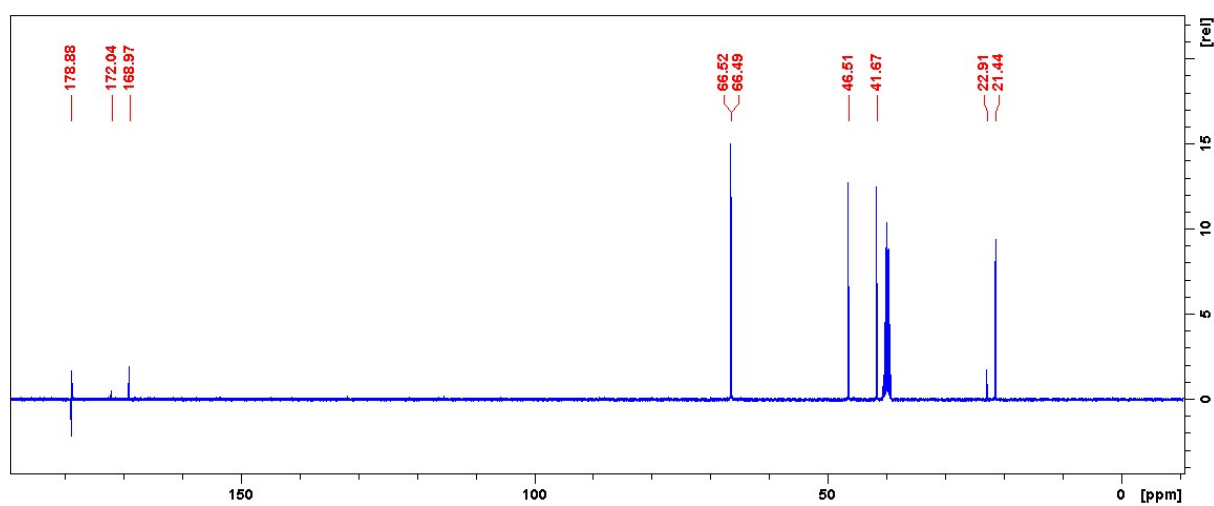

Figure S31.  $^{13}\text{C}$  NMR spectrum of 1-morpholinoethanone measured in DMSO- $d_6$  at 296 K.

<sup>1</sup>H NMR spectrum of Ogy104 in DMSO-d<sub>6</sub> (400 MHz; 32 scans)  
File: exp  
Pulse Sequence: s2pu1

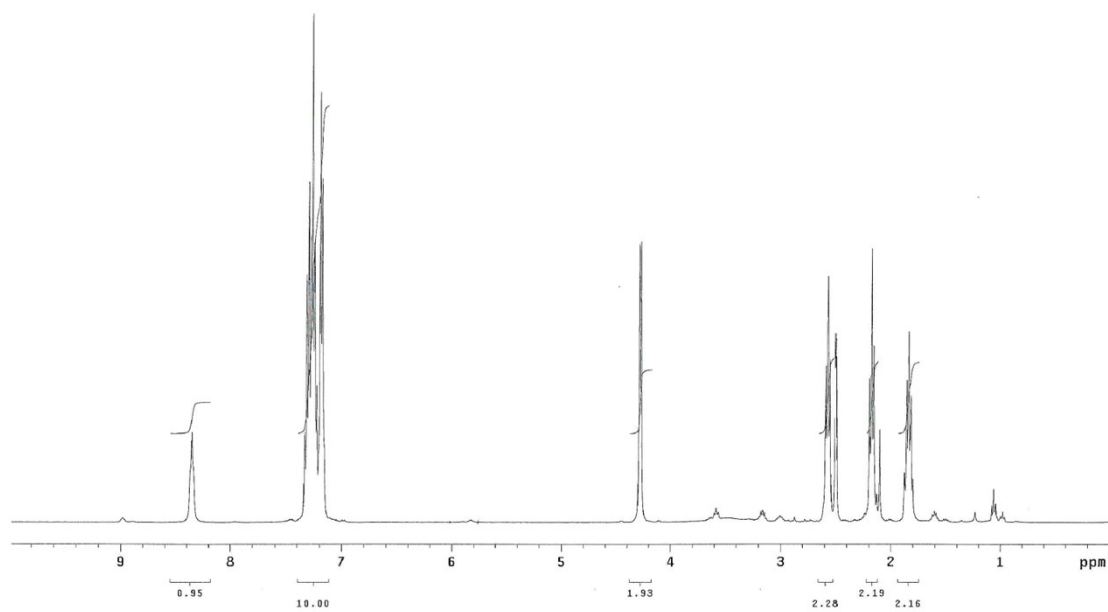

**Figure S32.** <sup>1</sup>H NMR spectrum of N-benzyl-4-phenylbutanamide measured in DMSO-d<sub>6</sub> at 296 K gained by the scale-up reaction.

<sup>13</sup>C NMR spectrum of Ogy104 in DMSO-d<sub>6</sub> (100.6 MHz; 256 scans)  
File: exp  
Pulse Sequence: s2pu1

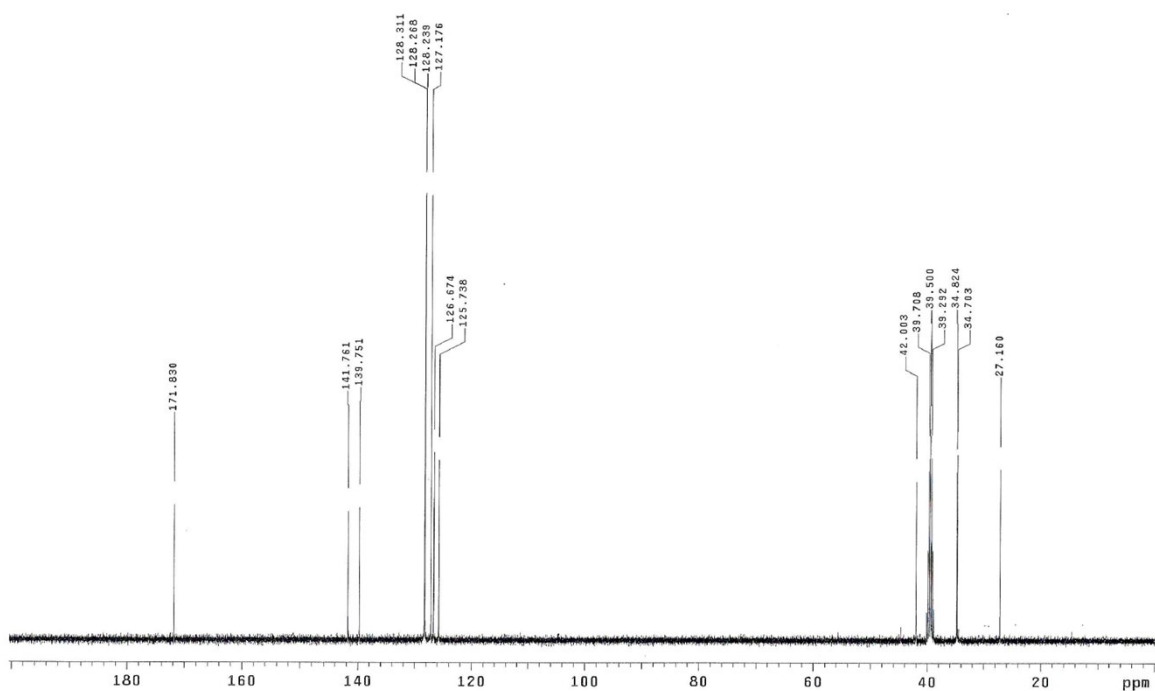

**Figure S33.** <sup>13</sup>C NMR spectrum of N-benzyl-4-phenylbutanamide measured in DMSO-d<sub>6</sub> at 296 K gained by the scale-up reaction.
